# Supplementary material
Source: HighWire-hosted journal article supplement (https://erj.ersjournals.com/content/54/3/1900900)

## FLOW CHART: SECTION 1

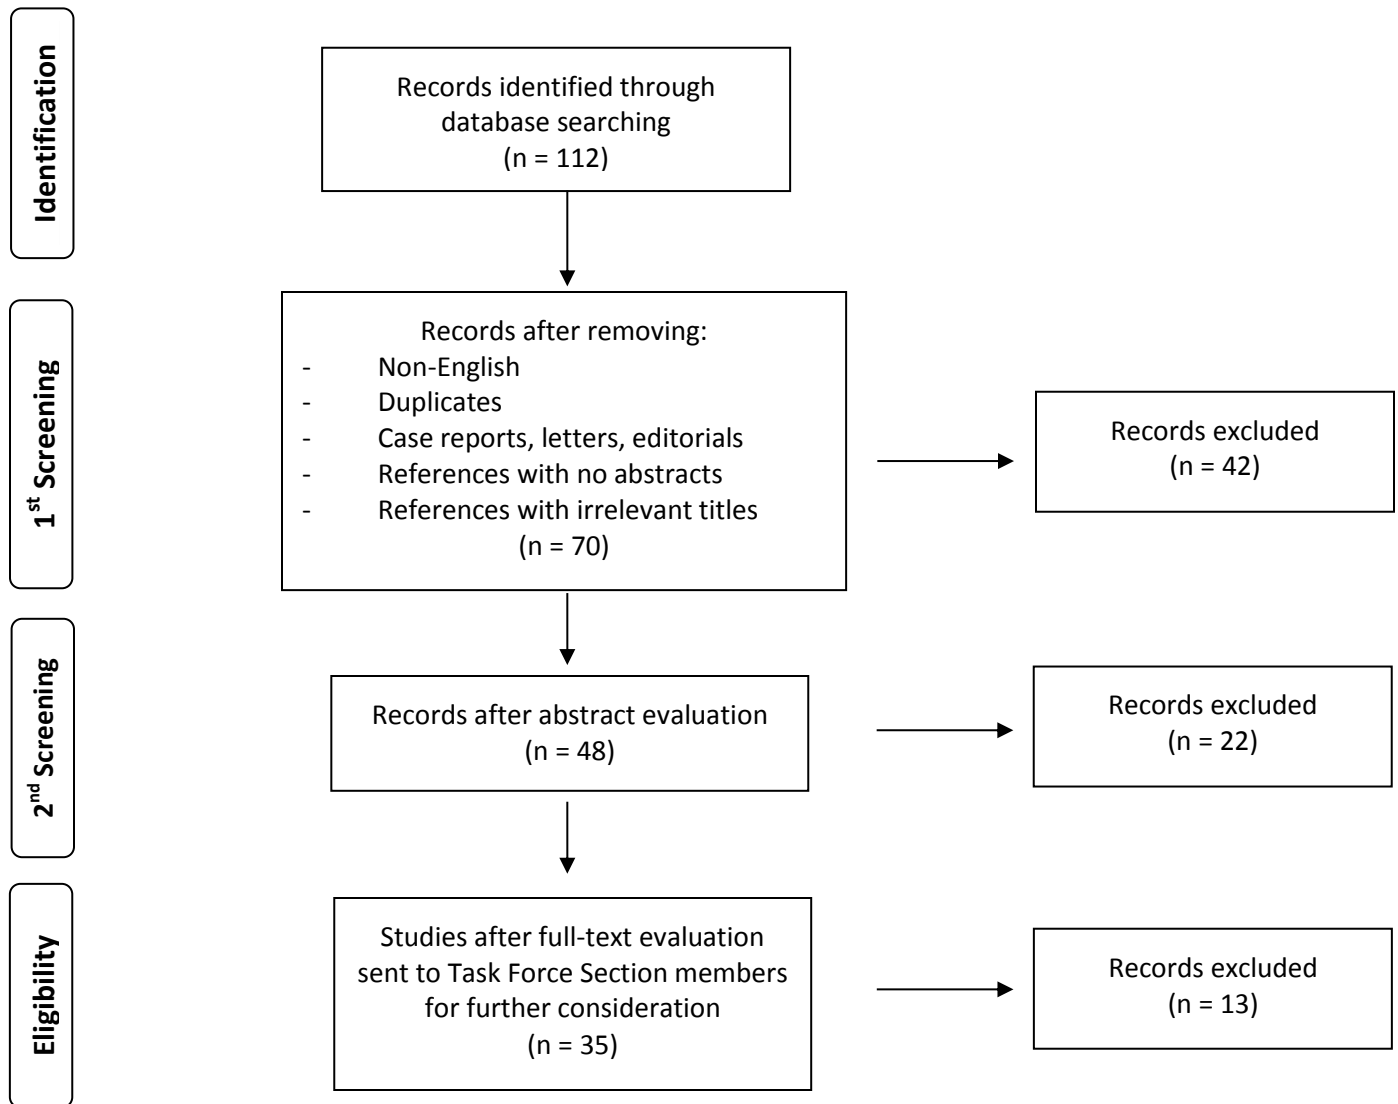

**FLOW CHART: SECTION 2 (Sections 2A to 2H)**

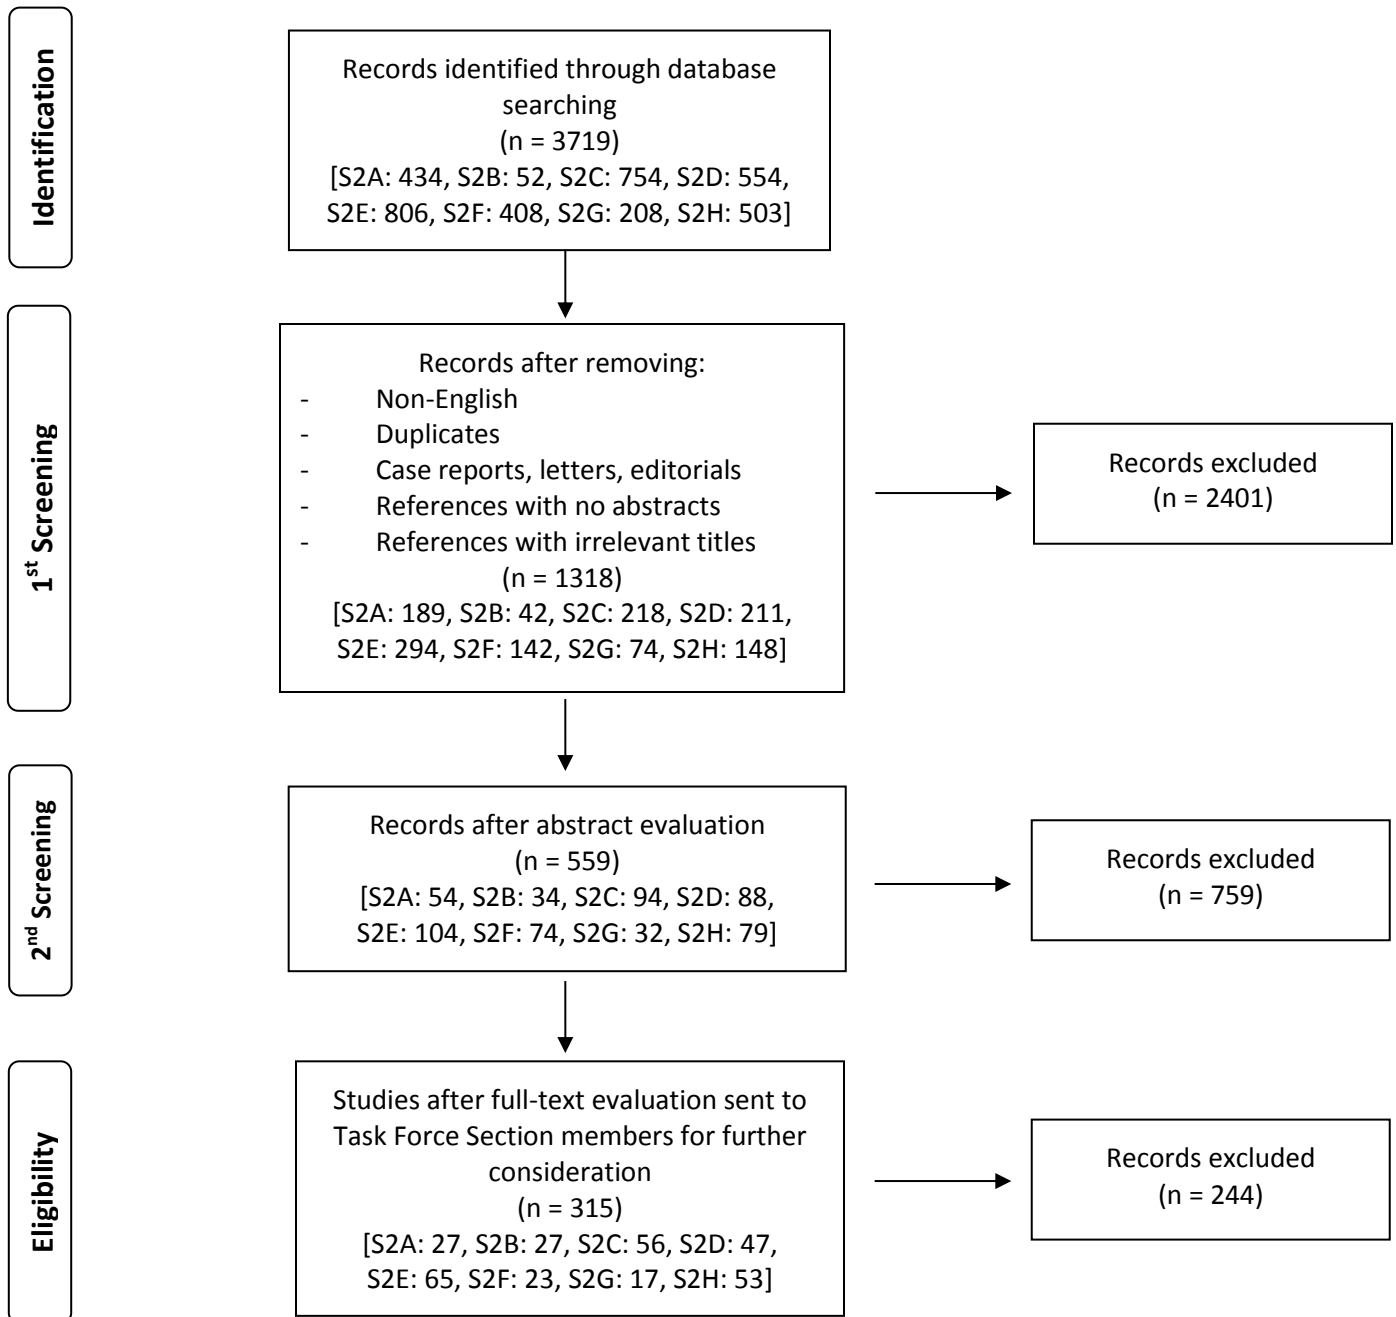

### FLOW CHART: SECTION 3

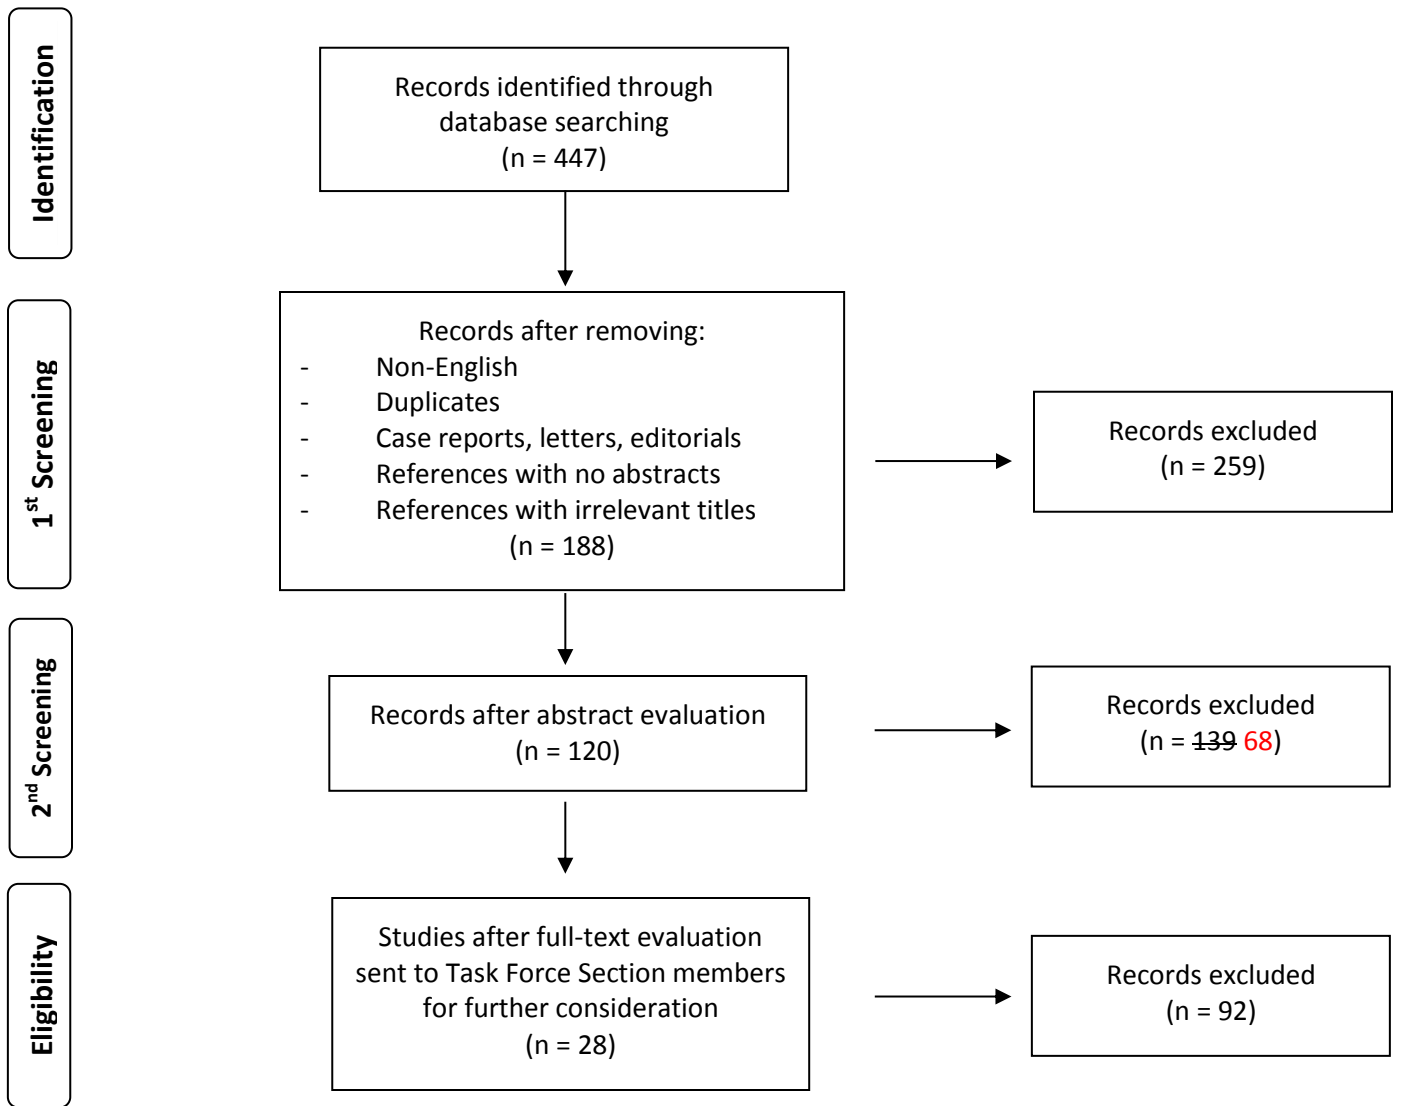

#### FLOW CHART: SECTION 4

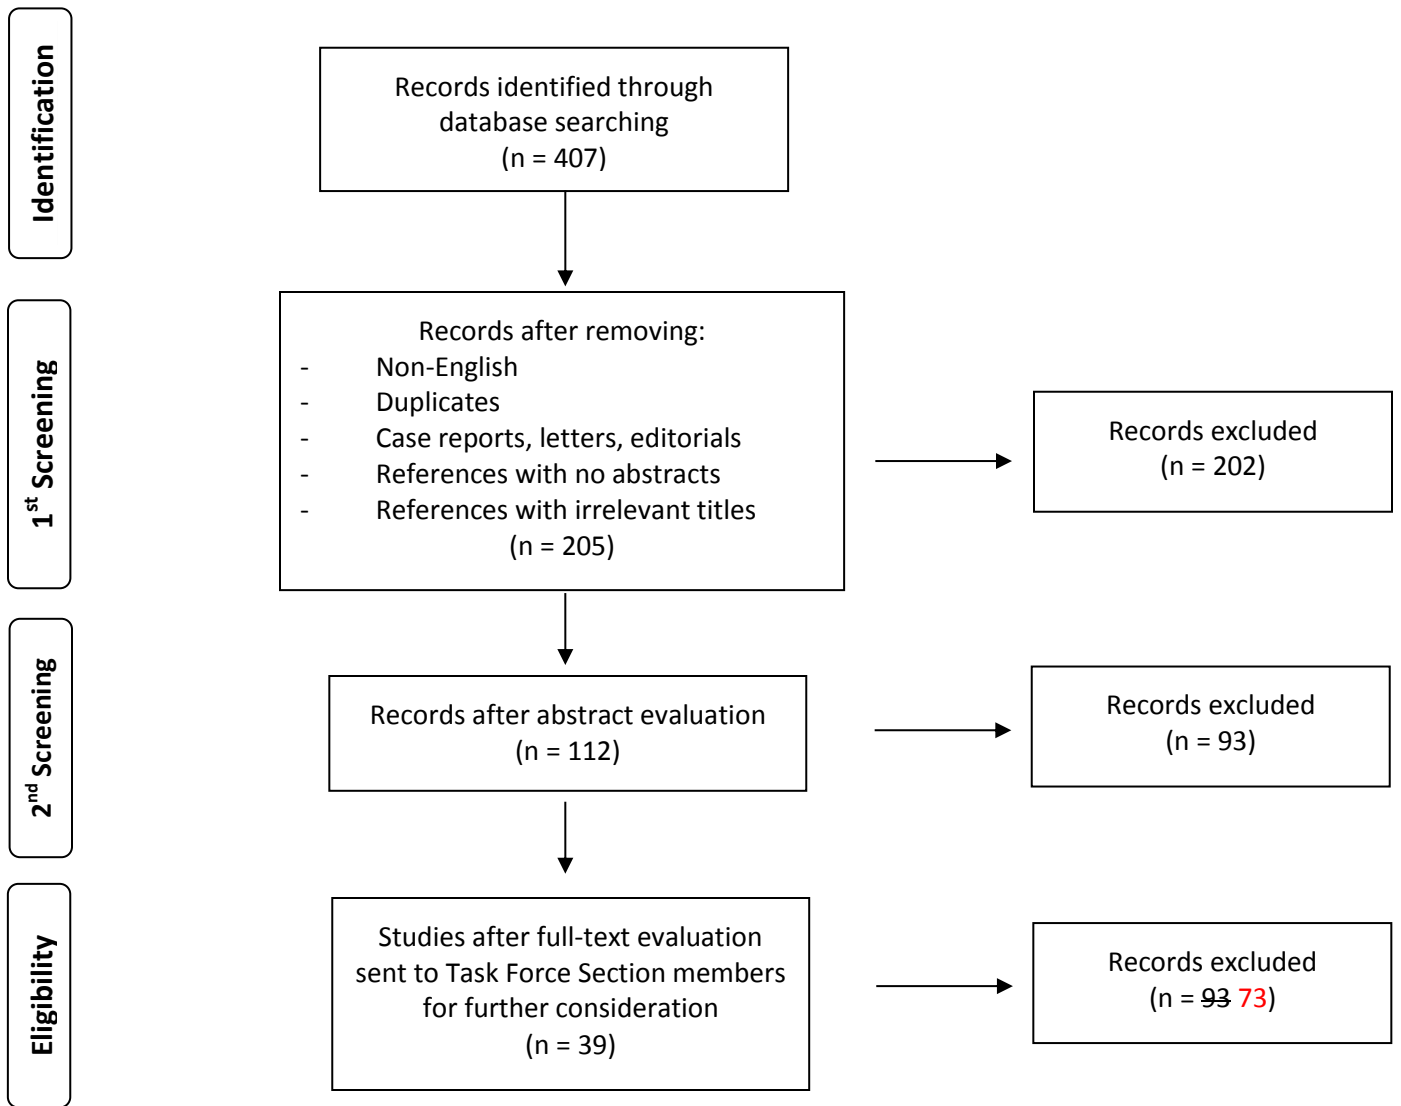

Supplement: inline-supplementary-material-1 [file inline-supplementary-material-1.pdf]
