# Supplementary material
Source: HighWire-hosted journal article supplement (https://erj.ersjournals.com/content/54/3/1900900)
Supplement: inline-supplementary-material-2 [file inline-supplementary-material-2.pdf]

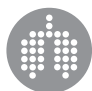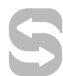

SHAREABLE PDF

# ERS/EAACI statement on severe exacerbations in asthma in adults: facts, priorities and key research questions

Arnaud Bourdin<sup>1</sup>, Leif Bjermer<sup>2</sup>, Christopher Brightling<sup>3</sup>, Guy G. Brusselle<sup>4</sup>, Pascal Chanez<sup>5</sup>, Kian Fan Chung<sup>6</sup>, Adnan Custovic<sup>7</sup>, Zuzana Diamant<sup>8,9</sup>, Sarah Diver<sup>10</sup>, Ratko Djukanovic<sup>11</sup>, Dominique Hamerlijncx<sup>12</sup>, Ildikó Horváth<sup>13</sup>, Sebastian L. Johnston<sup>14</sup>, Frank Kannies<sup>15</sup>, Nikos Papadopoulos<sup>16,17</sup>, Alberto Papi<sup>18</sup>, Richard J. Russell<sup>19</sup>, Dermot Ryan<sup>20,21</sup>, Konstantinos Samitas<sup>22</sup>, Thomy Tonia<sup>23</sup>, Eleftherios Zervas<sup>24</sup> and Mina Gaga<sup>24</sup>

**Affiliations:** <sup>1</sup>Université de Montpellier, CHU Montpellier, PhyMedExp, INSERM, CNRS, Montpellier, France. <sup>2</sup>Dept of Respiratory Medicine and Allergy, Lung and Allergy research Unit, Lund, Sweden. <sup>3</sup>Dept of Infection, Immunity and Inflammation, Institute for Lung Health, NIHR BRC Respiratory Medicine, University of Leicester, Leicester, UK. <sup>4</sup>Dept of Respiratory Diseases, Ghent University Hospital, Ghent, Belgium. <sup>5</sup>University of Marseille, Marseille, France. <sup>6</sup>National Heart and Lung Institute, Imperial College, London, UK. <sup>7</sup>Dept of Paediatrics, Imperial College London, London, UK. <sup>8</sup>Dept of Respiratory Medicine and Allergy, Skane University Hospital, Lund, Sweden. <sup>9</sup>Respiratory and Allergy Research, QPS Netherlands, The Netherlands. <sup>10</sup>Dept of Respiratory Sciences, College of Life Sciences, Respiratory Biomedical Research Unit, Glenfield Hospital, Leicester, UK. <sup>11</sup>University Hospital Southampton NHS Foundation Trust, Southampton, UK. <sup>12</sup>Amsterdam, The Netherlands. <sup>13</sup>National Koranyi Institute for Pulmonology, and Dept of Public Health, Semmelweis University, Budapest, Hungary. <sup>14</sup>Dept of Respiratory Medicine, Imperial College London, London, UK. <sup>15</sup>Reinfeld, Germany. <sup>16</sup>Division of Infection, Immunity and Respiratory Medicine, University of Manchester, Manchester, UK. <sup>17</sup>Allergy Dept, 2nd Pediatric Clinic, University of Athens, Athens, Greece. <sup>18</sup>Respiratory Medicine, University of Ferrara, Ferrara, Italy. <sup>19</sup>Institute for Lung Health, NIHR Leicester Biomedical Research Centre, Dept of Infection, Immunity and Inflammation, University of Leicester, Leicester, UK. <sup>20</sup>Allergy and Respiratory Research Group, Centre for Population Health Sciences, University of Edinburgh, Edinburgh, UK. <sup>21</sup>Woodbrook Medical Centre, Loughborough, UK. <sup>22</sup>7th Resp. Med. Dept and Asthma Centre, Athens Chest Hospital, Athens, Greece. <sup>23</sup>Institute of Social and Preventive Medicine, University of Bern, Bern, Switzerland. <sup>24</sup>7th Respiratory Medicine Dept, Athens Chest Hospital, Athens, Greece.

**Correspondence:** M. Gaga, Athens Chest Hospital Sotiria, 7th Respiratory Medicine Dept, 152 Mesogion Ave, Athens, 15452, Greece. Email: minagaga@yahoo.com

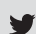

@ERSpublications

ERS/EAACI statement on severe exacerbations in asthma in adults <http://bit.ly/2Hl8sqf>

**Cite this article as:** Bourdin A, Bjermer L, Brightling C, *et al.* ERS/EAACI statement on severe exacerbations in asthma in adults: facts, priorities and key research questions. *Eur Respir J* 2019; 54: 1900900 [https://doi.org/10.1183/13993003.00900-2019].

This single-page version can be shared freely online.

**ABSTRACT** Despite the use of effective medications to control asthma, severe exacerbations in asthma are still a major health risk and require urgent action on the part of the patient and physician to prevent serious outcomes such as hospitalisation or death. Moreover, severe exacerbations are associated with substantial healthcare costs and psychological burden, including anxiety and fear for patients and their families. The European Academy of Allergy and Clinical Immunology (EAACI) and the European Respiratory Society (ERS) set up a task force to search for a clear definition of severe exacerbations, and to also define research questions and priorities. The statement includes comments from patients who were members of the task force.
